# Supplementary material
Source: PubMed Central journal article supplement (PMC7857044)
Supplement: NIHMS1604970-supplement-1.pdf [file NIHMS1604970-supplement-1.pdf]

## Appendix

**Supplemental Table 1**

Activities examined and assigned MET values, NHANES 1999–2006

| Activities    | Moderate intensity | Vigorous intensity |
|---------------|--------------------|--------------------|
| Walking       | 3.5                | 5.0                |
| Bicycling     | 4.0                | 8.0                |
| Running       | 7.0                | 10.0               |
| Dance         | 4.5                | 6.0                |
| Golf          | 3.5                | 4.5                |
| Stretching    | 2.5                | 2.5                |
| Weightlifting | 3.0                | 6.0                |

METs were defined by the NHANES Physical Activity Codebook.

**Supplemental Table 3**

Sensitivity analyses of associations of leisure-time activities with CVD and cancer mortality, NHANES 1999–2006

| Activity*                           | Number of deaths | HR (95% CI)       |
|-------------------------------------|------------------|-------------------|
| <b>CVD mortality<sup>†</sup></b>    |                  |                   |
| Walking                             | 130              | 0.64 (0.45, 0.90) |
| Bicycling                           | 34               | 0.84 (0.50, 1.43) |
| Running                             | 22               | 0.67 (0.36, 1.24) |
| Dancing                             | 23               | 1.34 (0.67, 2.68) |
| Golf                                | 20               | 1.19 (0.67, 2.12) |
| Stretching                          | 11               | 0.69 (0.30, 1.59) |
| Weightlifting                       | 9                | 0.58 (0.19, 1.76) |
| <b>Cancer mortality<sup>‡</sup></b> |                  |                   |
| Walking                             | 199              | 0.92 (0.72, 1.18) |
| Bicycling                           | 47               | 0.72 (0.47, 1.08) |
| Running                             | 45               | 0.78 (0.51, 1.21) |
| Dancing                             | 29               | 1.08 (0.71, 1.65) |
| Golf                                | 34               | 1.04 (0.62, 1.75) |
| Stretching                          | 23               | 0.87 (0.43, 1.74) |
| Weightlifting                       | 20               | 0.87 (0.45, 1.70) |

\* Self-reported participation in the specific leisure-time activity at a moderate-to-vigorous intensity for at least 10 min in the past 30 d, any participation versus none (referent).

<sup>†</sup> Excludes participants with a history of CVD ( $n = 1968$ ); final  $n = 15,971$ . Weighted estimates, adjusted for age, gender, race, education, cigarette use, heavy alcohol consumption, body mass index, leisure-time MET  $\times$  minutes/week minus the MET  $\times$  minutes/week spent in the specific activity under study, household MET  $\times$  minutes/week, transportation MET  $\times$  minutes/week, and history of pre-existing conditions including diabetes, arthritis, cancer, and disability.

<sup>‡</sup> Excludes participants with a history of cancer ( $n = 1633$ ); final  $n = 16,305$ . Weighted estimates, adjusted for age, gender, race, education, cigarette use, heavy alcohol consumption, body mass index, leisure-time MET  $\times$  minutes/week minus the MET  $\times$  minutes/week spent in the specific activity under study, household MET  $\times$  minutes/week, transportation MET  $\times$  minutes/week, and history of pre-existing conditions including diabetes, arthritis, disability, and CVD.

**Supplemental Table 2**Associations of participating in <60 min or  $\geq 60$  min of leisure-time activities with all-cause mortality ( $n = 17,938$ ),\* NHANES 1999–2006

| Activity (min/wk)    | Number of deaths | HR (95% CI)       |
|----------------------|------------------|-------------------|
| <b>Walking</b>       |                  |                   |
| 0                    | 3012             | 1.00              |
| <60                  | 173              | 0.64 (0.53, 0.79) |
| $\geq 60$            | 614              | 0.76 (0.68, 0.85) |
| <b>Bicycling</b>     |                  |                   |
| 0                    | 3622             | 1.00              |
| <60                  | 75               | 0.65 (0.50, 0.84) |
| $\geq 60$            | 102              | 0.83 (0.63, 1.08) |
| <b>Running</b>       |                  |                   |
| 0                    | 3635             | 1.00              |
| <60                  | 72               | 0.80 (0.60, 1.07) |
| $\geq 60$            | 92               | 0.63 (0.49, 0.81) |
| <b>Dance</b>         |                  |                   |
| 0                    | 3688             | 1.00              |
| <60                  | 74               | 0.99 (0.76, 1.28) |
| $\geq 60$            | 37               | 1.02 (0.62, 1.68) |
| <b>Golf</b>          |                  |                   |
| 0                    | 3689             | 1.00              |
| <60                  | 19               | 0.83 (0.48, 1.45) |
| $\geq 60$            | 91               | 0.84 (0.66, 1.07) |
| <b>Stretching</b>    |                  |                   |
| 0                    | 3697             | 1.00              |
| <60                  | 40               | 0.76 (0.50, 1.15) |
| $\geq 60$            | 62               | 0.83 (0.58, 1.19) |
| <b>Weightlifting</b> |                  |                   |
| 0                    | 3709             | 1.00              |
| <60                  | 33               | 0.75 (0.49, 1.16) |
| $\geq 60$            | 57               | 0.98 (0.68, 1.40) |

\* Typical participation in the specific leisure-time activity <60 min or  $\geq 60$  min compared with participation in the activity (referent). Weighted estimates, adjusted for age, gender, race, education, cigarette use, heavy alcohol consumption, body mass index, leisure-time MET\*minutes/week minus the MET\*minutes/week spent in the specific activity under study, household MET\*minutes/week and transportation MET\*minutes/week, and history of pre-existing conditions including diabetes, arthritis, cancer, disability, and CVD.
